# Supplementary material
Source: MDPI journal article supplement (https://www.mdpi.com/2073-4344/10/12/1470)
Supplement: s1 [file s1]

# One-Pot Biocatalytic Preparation of Enantiopure Unusual $\alpha$ -Amino Acids from $\alpha$ -Hydroxy Acids via a Hydrogen-Borrowing Dual-Enzyme Cascade

Fei Liu<sup>†</sup>, Junping Zhou<sup>†</sup>, Meijuan Xu, Taowei Yang, Minglong Shao, Xian Zhang\*, and Zhiming Rao\*

<sup>1</sup> The Key Laboratory of Industrial Biotechnology, Ministry of Education, School of Biotechnology, Jiangnan University, Wuxi, Jiangsu Province 214122, China; liufei1110@outlook.com (F.L.); zhoujp116@sina.com (J.Z.); xumeijuan@jiangnan.edu.cn (M.X.); yangtw@jiangnan.edu.cn (T.Y.); mlshao@jiangnan.edu.cn (M.S.)

\* Correspondence: zx@jiangnan.edu.cn (X.Z.); raozhm@jiangnan.edu.cn (Z.R.); Tel: 86-0510-85916881 (Z.R.); Fax: 86-0510-85918516 (Z.R.)

<sup>†</sup> Authors contributed equally to this study.

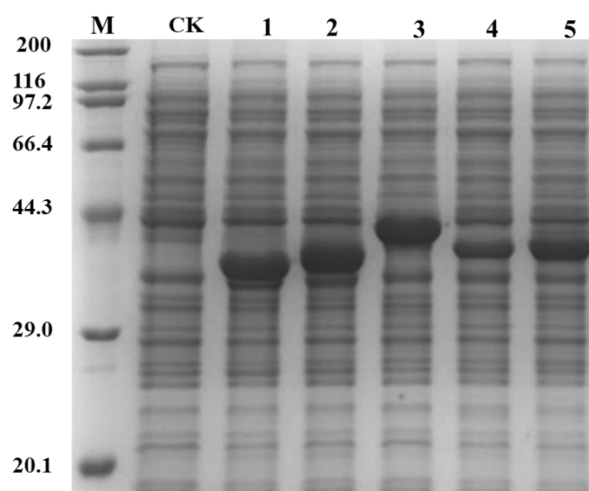

**Figure S1:** SDS-PAGE analysis of the expression of D-hydroxy acid dehydrogenases from different sources. Lane M is the standard marker protein. CK *E. coli*-pET-28a, Line 1 *E. coli*-pET-28a-*LbMDH*, Line 2 *E. coli*-pET-28a-*EfMDH*, Line 3 *E. coli*-pET-28a-*PaDLacDH*, Line 4 *E. coli*-pET-28a-*Pa2D2R*, Line 5 *E. coli*-pET-28a-*SaDLacDH*.

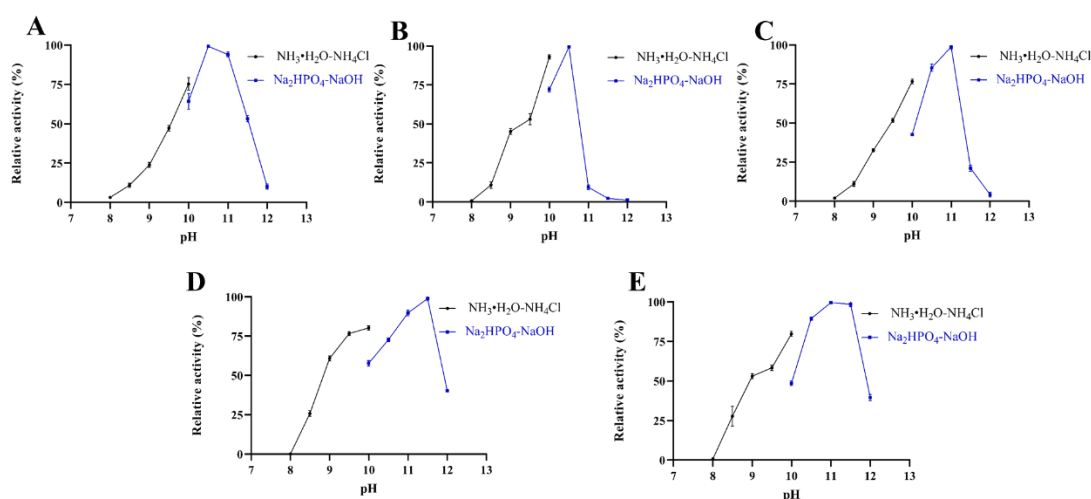

**Figure S2:** Optimum pH of D-hydroxy acid dehydrogenase from different sources. (A) *LbMDH* from *Lactobacillus brevis*; (B) *Ef2D2R* from *Enterococcus faecalis*; (C) *SaDLacDH* from *Staphylococcus aureus*; (D) *PaDLacDH* and (E) *Pa2D2R* from *Pseudomonas aeruginosa*.

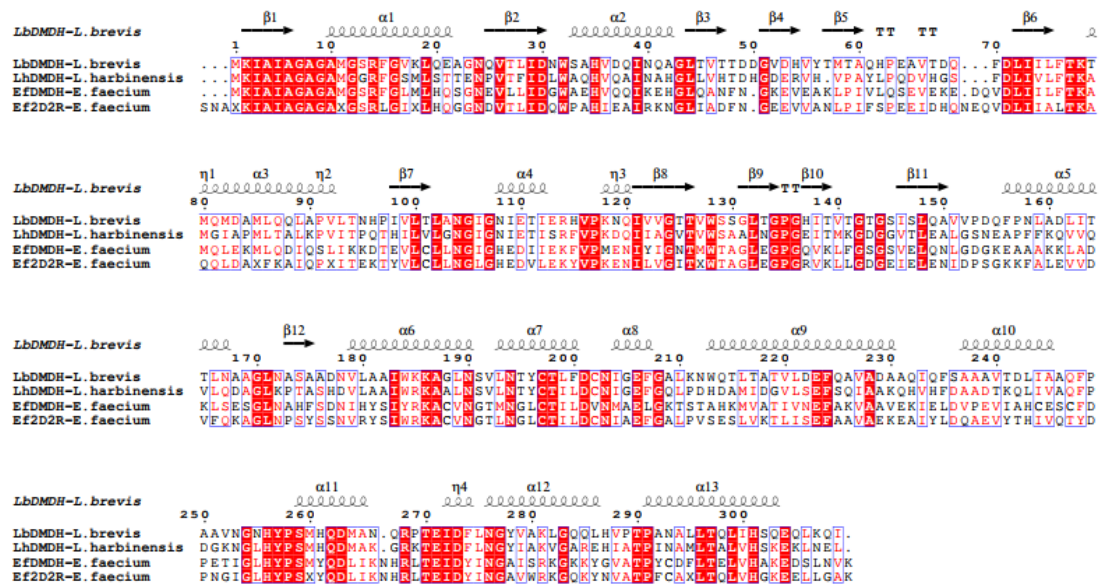

**Figure S3:** Multiple-sequence alignment of D-mandelate dehydrogenase with other D-hydroxy acid dehydrogenase from *Lactobacillus harbinensis* and *E. faecium* by the help of software Clustal X and Esript 3. Conserved residues were indicated by intense red color.

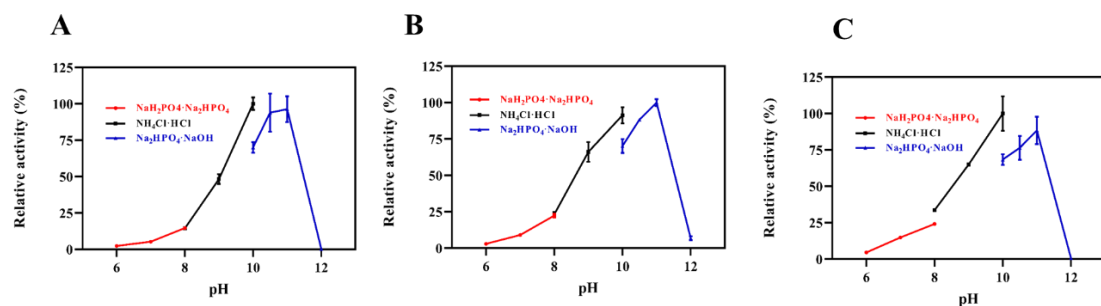

**Figure S4:** Optimum pH of variants of *LbMDH*. (A) Mutation L243M; (B) L243I; (C) L243V

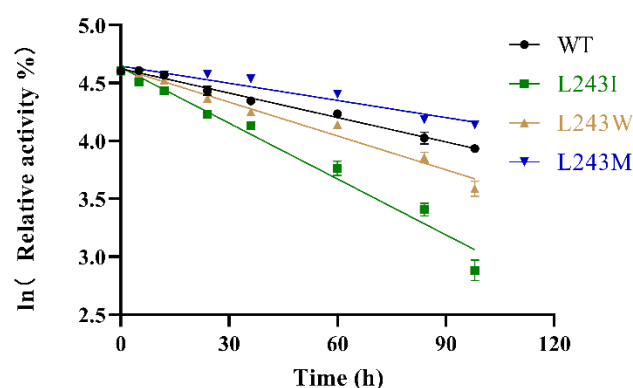

**Figure S5:** The exponential fitting curves of the data points of thermostability analysis. Thermal stability analysis of wild-type *LbMDH* and variants were performed at 40 °C. Error bars showed the standard deviation and data were collected from three independent experiments.

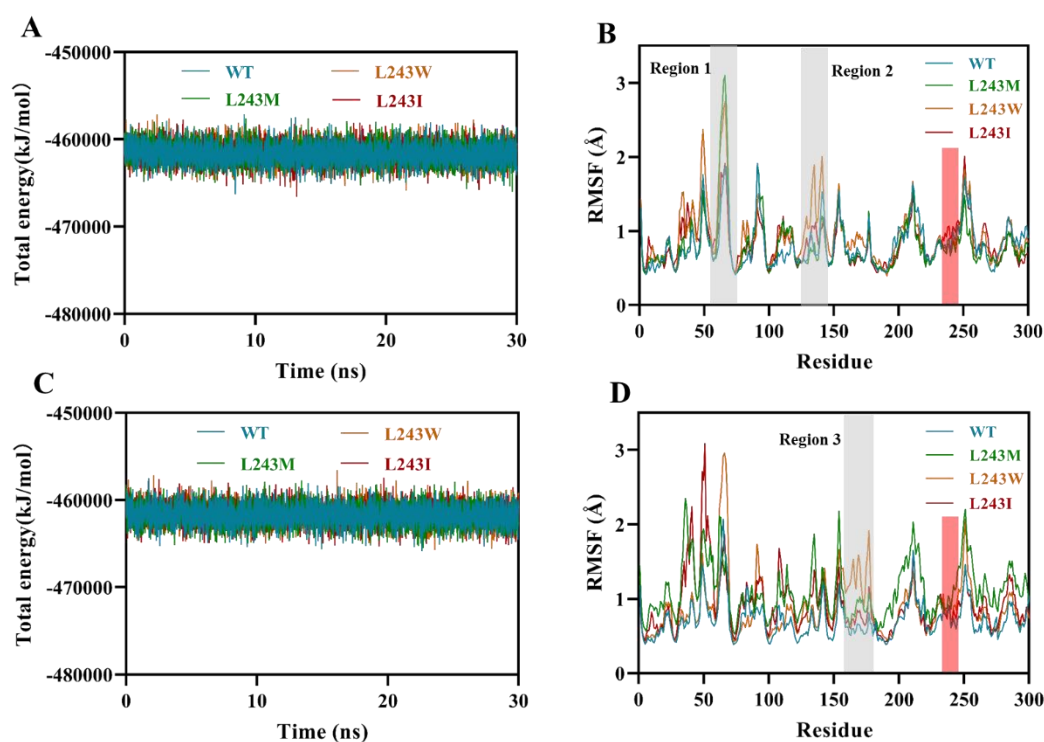

**Figure S6:** Structure analysis of *LbMDH* and the variants by MD simulation. (A) Total energy of *LbMDH* and the variants with NAD and D-mandelic acid; (B) RMSF of *LbMDH* and the variants with NAD and D-mandelic acid; (C) Total energy of *LbMDH* and the variants with NAD and D- $\alpha$ -hydroxybutyric acid; (D) RMSF of *LbMDH* and the variants with NAD and D- $\alpha$ -hydroxybutyric acid. The grey shadowed regions 1, 2, 3 represent the loops. The red shadowed region was where the 243 residue is.

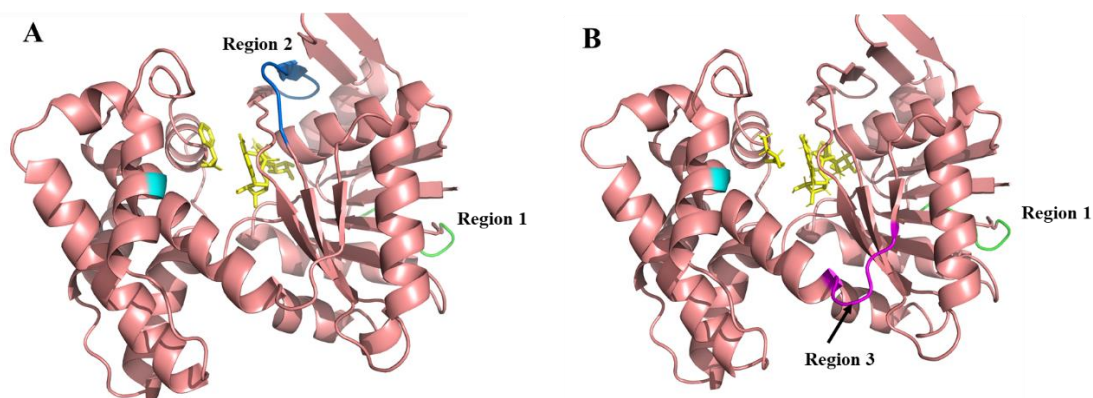

**Figure S7:** Structure analysis of *LbMDH* and the variants. (A) The structure of *LbMDH* compound with NAD and D-mandelic acid; (B) the structure of *LbMDH* compound with NAD and D- $\alpha$ -hydroxybutyric acid. The structure was displayed with different colors: the carbon backbone marked in salmon, the 243 residue marked in cyan, region 1 (residues from 62-68) marked in green, region 2 (residues from 135-144) marked in marine, region 3 (residues from 175-179) marked in magenta.

**Table S1:** Primers used for cloning of D-hydroxy acid dehydrogenase

| Primers            | Primer sequences 5'-3'                             |
|--------------------|----------------------------------------------------|
| <i>Lb</i> MDH-F    | GGGTCGCGGATCC <b>GAATTC</b> ATGAAAATCGCCATTGCGGG   |
| <i>Lb</i> MDH-R    | CTCGAGTGCGGCCG <b>CAAGCTT</b> TCAAATCTGCTTCAGCTG   |
| <i>Ef</i> 2D2R-F   | TGGGTCGCGGATCC <b>GAATTC</b> ATGAAAATAGCAATTGCAGG  |
| <i>Ef</i> 2D2R-R   | CGAGTGCGGCCG <b>CAAGCTT</b> TTTATTTTACGTTCAAACCTA  |
| <i>Pa</i> DlacDH-F | TGGGTCGCGGATCC <b>GAATTC</b> ATGCGCATCCTGTTCTTCAG  |
| <i>Pa</i> DlacDH-R | CGAGTGCGGCCG <b>CAAGCTT</b> TTTAGGCCCGGACCCGATTGCG |
| <i>Pa</i> 2D2R-F   | TGGGTCGCGGATCC <b>GAATTC</b> ATGACCTGGCATATCCTCGG  |
| <i>Pa</i> 2D2R-R   | CGAGTGCGGCCG <b>CAAGCTT</b> TTAGCGGTTCGGGCAAACCGCG |
| <i>Sa</i> DlacDH-F | GGGTCGCGGATCC <b>GAATTC</b> ATGACAAAAATTATGTTCTTTG |
| <i>Sa</i> DlacDH-R | CTCGAGTGCGGCCG <b>CAAGCTT</b> TTAATTTAAACGTGTTTC   |

Note: The bold type shows the site of restriction enzymes *Eco*R I and *Hind* III.

**Table S2:** Primers used for site-directed and saturated mutagenesis

| Primers | Primer sequences 5'-3'             |
|---------|------------------------------------|
| V127A-F | CGGCACGACGG <b>CCT</b> GGTCCTCCG   |
| L189A-F | GAAGGCGGGCG <b>CCA</b> ACAGCGTGC   |
| L189W-F | GAAGGCGGG <b>CTG</b> GAACAGCGTGC   |
| L193A-F | CAACAGCGTGG <b>GCA</b> ATACGTACTG  |
| L193W-F | CAACAGCGTGT <b>GGA</b> ATACGTACTG  |
| I204A-F | CGACTGCAATG <b>CCG</b> GGCGAGTTCGG |
| L243A-F | CGTCACCGATG <b>CC</b> ATTGCCGCGC   |
| L243W-F | CGTCACCGAT <b>TGG</b> ATTGCCGCGC   |
| Q247A-F | CTGATTGCCGCG <b>GCC</b> TTTCCGGCCG |
| Q247W-F | CTGATTGCCGCG <b>TGG</b> TTTCCGGCCG |
| L243X-F | CGTCACCGATNNNATTGCCGCGC            |
| 28a-R   | GCCTTACTGGTTAGCAGAAATG             |

Note: Mutation sites are shown in bold and italic. Saturated mutation sites were substituted NNN (N=A/G/C/T).
